# Supplementary material
Source: PubMed Central journal article supplement (PMC9699905)
Supplement: NIHMS1815509-supplement-Supp_2.pdf [file NIHMS1815509-supplement-Supp_2.pdf]

Appendix B Supplementary Table 1

Overview of instruments assessing grief in the context of traumatic loss.

| Instrument                                     | Reference                       | Construct Assessed / Diagnostic Capacity                                                                    | Versions available/Other names for measure)                                                                                                                     | Format, Number of Items, Scales/ Factors                                                                        | Scoring/ Interpretation                                                                                                 | Language(s)                                                                                           | # of studies |
|------------------------------------------------|---------------------------------|-------------------------------------------------------------------------------------------------------------|-----------------------------------------------------------------------------------------------------------------------------------------------------------------|-----------------------------------------------------------------------------------------------------------------|-------------------------------------------------------------------------------------------------------------------------|-------------------------------------------------------------------------------------------------------|--------------|
| <b>Measures of Pathological Grief Symptoms</b> |                                 |                                                                                                             |                                                                                                                                                                 |                                                                                                                 |                                                                                                                         |                                                                                                       |              |
| Inventory of Complicated Grief                 | Prigerson et al. (1995)         | Complicated Grief, Prolonged Grief symptoms<br><br>Cut off scores provided for probable dx of CG, PCBD, PGD | ICG-Revised, Inventory of Traumatic Grief, Traumatic Grief Evaluation of Response to Loss; Prolonged Grief Disorders Interview, Prolonged Grief Disorders Scale | Self-report and clinician interview formats available; 19 items; Findings vary with respect to factor structure | Higher scores indicate greater CG/PGD symptom severity. A score of 25 or greater indicates probable CG diagnosis.       | English, Dutch, Hebrew, Albanian, Chinese, Korean, German, Norwegian, Italian, Arabic, Khmer, Turkish | 69           |
| Prolonged Grief Disorder-13                    | Prigerson & Maciejewski (2008)  | Prolonged Grief Disorder symptoms<br><br>Cut off scores provided for probable dx of PGD                     | NA                                                                                                                                                              | Self-report; 13 items corresponding with diagnostic criteria for PGD                                            | Algorithm to determine presence of Prolonged Grief Disorder diagnosis                                                   | English, Chinese, Tiv, French, Kiryarwanda                                                            | 13           |
| Traumatic Grief Inventory-Self Report          | Boelen & Smid (2017)            | PCBD and PGD Symptoms<br><br>PCBD and PGD Diagnoses                                                         | Many items taken from the ICG; 10-item version also used                                                                                                        | Self-report; 18 items; One factor                                                                               | PCBD score: sum items 1–11 and 13–18. PGD score: sum items 3–13. Higher scores indicate greater severity.               | English, Chinese, Arabic, Dutch                                                                       | 12           |
| Complicated Grief Assessment-Self-Report       | Prigerson & Maciejewski, (2006) | PGD Symptoms<br><br>PGD diagnostic screen                                                                   | NA                                                                                                                                                              | Self-report; 9 items consistent with PGD diagnostic criteria.                                                   | Higher scores indicate greater severity; Diagnostic criteria can be applied to identify a provisional diagnosis of PGD. | English, Khmer                                                                                        | 6            |
| Texas Inventory of Grief                       | Faschingbauer et al. (1977)     | Grief intensity<br><br>No diagnostic capacity                                                               | Texas Revised Inventory of Grief (21 items); Expanded Texas Inventory of Grief (58 items)                                                                       | Self-report; 14 items; Two Factors: 1) Past Behaviors (TRIG I), 2) Present Feelings (TRIG II)                   | Higher scores on the Present Feelings scale represent unresolved grief                                                  | English                                                                                               | 5            |

|                                                      |                                                    |                                                                                                  |                                                                                    |                                                                                                                                                                                                                                                                       |                                                                                                                           |                  |   |
|------------------------------------------------------|----------------------------------------------------|--------------------------------------------------------------------------------------------------|------------------------------------------------------------------------------------|-----------------------------------------------------------------------------------------------------------------------------------------------------------------------------------------------------------------------------------------------------------------------|---------------------------------------------------------------------------------------------------------------------------|------------------|---|
| Structured Clinical Interview for Complicated Grief  | Bui et al., 2015                                   | Complicated Grief, PCBD, PGD<br><br>Cut off scores provided for probable dx of CG, PCBD, and PGD | NA                                                                                 | Clinician-administered interview; 31 items; Five Factors: 1) Yearning and Emotional Pain, 2) Difficulty Accepting the Death, 3) Emotional Numbness, Loneliness, and Social Disconnection, 4) Suicidal Ideation and Meaninglessness, 5) Avoidance and Negative Effects | Higher scores indicate greater severity.                                                                                  | English, Korean  | 2 |
| International ICD-11 Prolonged Grief Disorders Scale | Killikelly et al. (2020)                           | Symptoms of PGD as outlined in ICD-11<br><br>PGD Diagnosis                                       | NA                                                                                 | Self-report; 34 items; Two Factors: 1) Core Grief, 2) Culturally-Specific Symptoms                                                                                                                                                                                    | Higher scores indicate greater severity.                                                                                  | German, Chinese  | 2 |
| Revised Grief Experiences Inventory                  | Lev et al. (1993)                                  | Broad grief experiences<br><br>No diagnostic capacity                                            | Shortened version of Grief Experiences Inventory (Sanders, Mauger, & Strong, 1985) | Self-report; 22 items; Four Factors: 1) Existential Concerns, 2) Depression, 3) Tension and Guilt, 4) Physical Distress                                                                                                                                               | Higher scores within each of the domains reflect greater challenges of each grief-related theme.                          | English          | 2 |
| Hogan Grief Reactions Checklist                      | Hogan & Schmidt (2001)                             | Grief reactions<br><br>No diagnostic capacity                                                    | NA                                                                                 | Self-report; 61 items; Six Factors: 1) Despair, 2) Panic Behavior, 3) Personal Growth, 4) Blame and Anger, 5) Detachment, 6) disorganization                                                                                                                          | Higher scores indicate greater severity.                                                                                  | English          | 2 |
| UCLA Grief Inventory                                 | Layne, Poppleton, Saltzman, & Pynoos, (2006)       | Grief reactions<br><br>No diagnostic capacity                                                    | Expanded Grief Inventory (28 items; Layne et al., 2001)                            | Self-report; 20 items; Three Factors: 1) Normal Grief, 2) Traumatic Grief, 3) Existentially Complicated Grief                                                                                                                                                         | Higher scores indicate greater severity; higher scores on each scale indicate greater difficulties with that grief theme. | Bosnian, English | 1 |
| Brief Grief Questionnaire (BGQ)                      | Ito et al. (2012)                                  | Screeners for CG                                                                                 | NA                                                                                 | Self-report or clinician interview; 5 items; Factor structure NR                                                                                                                                                                                                      | Score of $\geq 4$ indicates positive screen for probable CG                                                               | English          | 1 |
| Clinical Global Impressions Scale-Severity           | Shear et al. (2005)                                | Severity of CG<br><br>No diagnostic capacity                                                     | NA                                                                                 | Clinician Ratings; unknown items; Factor Structure N/A                                                                                                                                                                                                                | Higher scores indicate greater severity.                                                                                  | English          | 1 |
| Modified Version of the Complicated Grief Module     | Horowitz et al. (2003); Langner & Maercker, (2005) | PGD Symptoms<br><br>PGD Diagnosis                                                                | NA                                                                                 | Clinician-administered interview; 34 items; Three Factors: 1) Intrusions, 2) Avoidance, 3) Failure to Adapt to Loss                                                                                                                                                   | Higher scores indicate greater severity; Diagnostic criteria can be applied to identify a provisional diagnosis of PGD.   | German, English  | 1 |

|                                                              |            |                                                  |    |                                                                                                          |                                                  |         |   |
|--------------------------------------------------------------|------------|--------------------------------------------------|----|----------------------------------------------------------------------------------------------------------|--------------------------------------------------|---------|---|
| Persistent Complex Bereavement Inventory Core Grief Subscale | Lee (2015) | Persistent Complex Bereavement Disorder symptoms | NA | Self-report; 16 items; Three Factors: 1) Core Grief, 2) Reactive Distress, 3) Social/Identity Disruption | Higher scores indicate greater symptom severity. | English | 1 |
|                                                              |            | Cut off scores provided for probable dx of PCBD  |    |                                                                                                          |                                                  |         |   |

### Measures of Grief-Related Constructs

|                                                                            |                              |                                                                                                     |                                               |                                                                                                                                                                                          |                                                                                                                                  |                                 |    |
|----------------------------------------------------------------------------|------------------------------|-----------------------------------------------------------------------------------------------------|-----------------------------------------------|------------------------------------------------------------------------------------------------------------------------------------------------------------------------------------------|----------------------------------------------------------------------------------------------------------------------------------|---------------------------------|----|
| Grief Experiences Questionnaire                                            | Barrett & Scott (1989)       | Grief severity; grief themes prevalent among suicide loss<br><br>No diagnostic capacity             | 16-Item version (Feigelman & Cerel, 2020)     | Self-report; 55 items; Eight Factors: 1) Somatic Reactions, 2) Search for Explanation, 3) Loss of Social Support, 4) Stigmatization 5) Guilt, 6) Responsibility, 7) Shame, 8) Rejection  | Total summed score reflects grief severity; Scale scores reflect respective grief theme                                          | German, English, Dutch, Flemish | 12 |
| Depressive and Anxious Avoidance in Prolonged Grief Questionnaire (DAAPGQ) | Boelen & van den Bout (2010) | Avoidance in cognitive-behavioral model of CG/PGD<br><br>Avoidance clusters in CB and PGD diagnoses | NA                                            | Self-report; 9-items<br>Two Factors: 1) Depressive Avoidance, 2) Anxious Avoidance                                                                                                       | Higher scores indicate greater severity of avoidance behavior.                                                                   | English and Dutch               | 5  |
| Grief Cognitions Questionnaire                                             | Boelen et al. (2005)         | Negative loss-related cognitions<br><br>No diagnostic capacity                                      | NA                                            | Self-report; 38 items; Nine Factors: 1) Self, 2) Life, 3) World, 4) Future, 5) Self-blame, 6) Others, 7) Catastrophic Misinterpretations, 8) Cherish Grief, 9) Appropriateness of Grief. | Higher summed scores indicate greater frequency of negative cognitions and their subtypes.                                       | English, Dutch, Turkish         | 4  |
| Death Imagery Scale                                                        | Rynearson & Correa (2008)    | Grief-related imagery<br><br>No diagnostic capacity                                                 | Dying-Imagery Scale Revised (DIS-R; 15 items) | Self-report; 5 items; Three Factors: 1) Reenactment, 2) Remorse, 3) Revenge                                                                                                              | Higher scores indicate more frequent death imagery.                                                                              | English                         | 3  |
| Utrecht Grief Rumination Scale                                             | Eisma et al. (2014)          | Grief-specific rumination<br><br>No diagnostic capacity                                             | NA                                            | Self-report; 15 items; Five Factors: 1) Reactions, 2) Injustice, 3) Counterfactuals, 4) Meaning, 5) Reactions of Others                                                                  | Higher total scores indicate greater grief-related rumination; summed scale scores reflect severity of grief rumination subtypes | English, Chinese, Dutch         | 1  |

### Measures Developed for Specific Types of Loss

|                                              |                                    |                                                                                                          |                                                     |                                                                                                                                                                                                                  |                                                                                                                                                                              |                                                                    |    |
|----------------------------------------------|------------------------------------|----------------------------------------------------------------------------------------------------------|-----------------------------------------------------|------------------------------------------------------------------------------------------------------------------------------------------------------------------------------------------------------------------|------------------------------------------------------------------------------------------------------------------------------------------------------------------------------|--------------------------------------------------------------------|----|
| Perinatal Grief Scale                        | Toedter, Lasker, & Alhadeff (1988) | Perinatal grief<br>No diagnostic capacity                                                                | Munich Grief Scale; Perinatal Grief Scale-Shortened | Self-report; 104 items (33 items for short version); Three Scales: 1) Active Grief, 2) Difficulty Coping, and 3) Despair                                                                                         | Higher scores indicate greater severity.                                                                                                                                     | German, Swedish, French, Sinhala, Chinese, English, Arabic, Indian | 31 |
| Perinatal Grief Intensity Scale              | Hutti et al. (1998)                | Perinatal grief<br>No diagnostic capacity                                                                | NA                                                  | Self-report; 14 items; Three Factors: 1) Reality, 2) Confront Others, 3) Congruence                                                                                                                              | Suggested cut off score of 3.53 (Hutti et al., 2017) to identify those in need of follow-up. Mean score for each subscale can be derived from averaging subscale item scores | English                                                            | 4  |
| Pandemic Grief Scale                         | Lee & Neimeyer (2020)              | Grief related to loss from COVID-19<br>No diagnostic capacity                                            | NA                                                  | Self-report; 5 items; One factor                                                                                                                                                                                 | Higher scores indicate greater severity.                                                                                                                                     | English, Turkish                                                   | 3  |
| Perinatal Bereavement Grief Scale            | Ritsher & Neugebauer (2002)        | Longing and yearning for the pregnancy and baby<br>No diagnostic capacity                                | NA                                                  | Self-report; 16 items; One factor                                                                                                                                                                                | Higher scores indicate greater severity.                                                                                                                                     | English, Spanish                                                   | 2  |
| <b>Measures of Normative Grief Reactions</b> |                                    |                                                                                                          |                                                     |                                                                                                                                                                                                                  |                                                                                                                                                                              |                                                                    |    |
| Core Bereavement Items                       | Burnett et al. (1997)              | Bereavement phenomena<br>No diagnostic capacity                                                          | NA                                                  | Self-report; 17 items; Three Factors: 1) Images and Thoughts, 2) Acute Separation, 3) Grief                                                                                                                      | Higher scores on each of the factors indicate greater severity on that dimension of bereavement.                                                                             | English                                                            | 1  |
| Two-Track Bereavement Questionnaire          | Rubin et al. (2009)                | Bereavement experiences consistent with Two-Track Model of Bereavement (TTMoB)<br>No diagnostic capacity | NA                                                  | Self-report; 70 items; Five Factors: 1) General Biopsychosocial Functioning, 2) Traumatic Perception of the Loss, 3) Active Relational Grieving, 4) Close and Positive Relationship, 5) Conflictual Relationship | Higher scores on each factor indicate greater severity or agreement of each of the facets of the TTMoB.                                                                      | English                                                            | 1  |
