# Supplementary material
Source: PubMed Central journal article supplement (PMC9699905)

# Appendix A Supplementary Figure 1

## PRISMA 2009 Flow Diagram

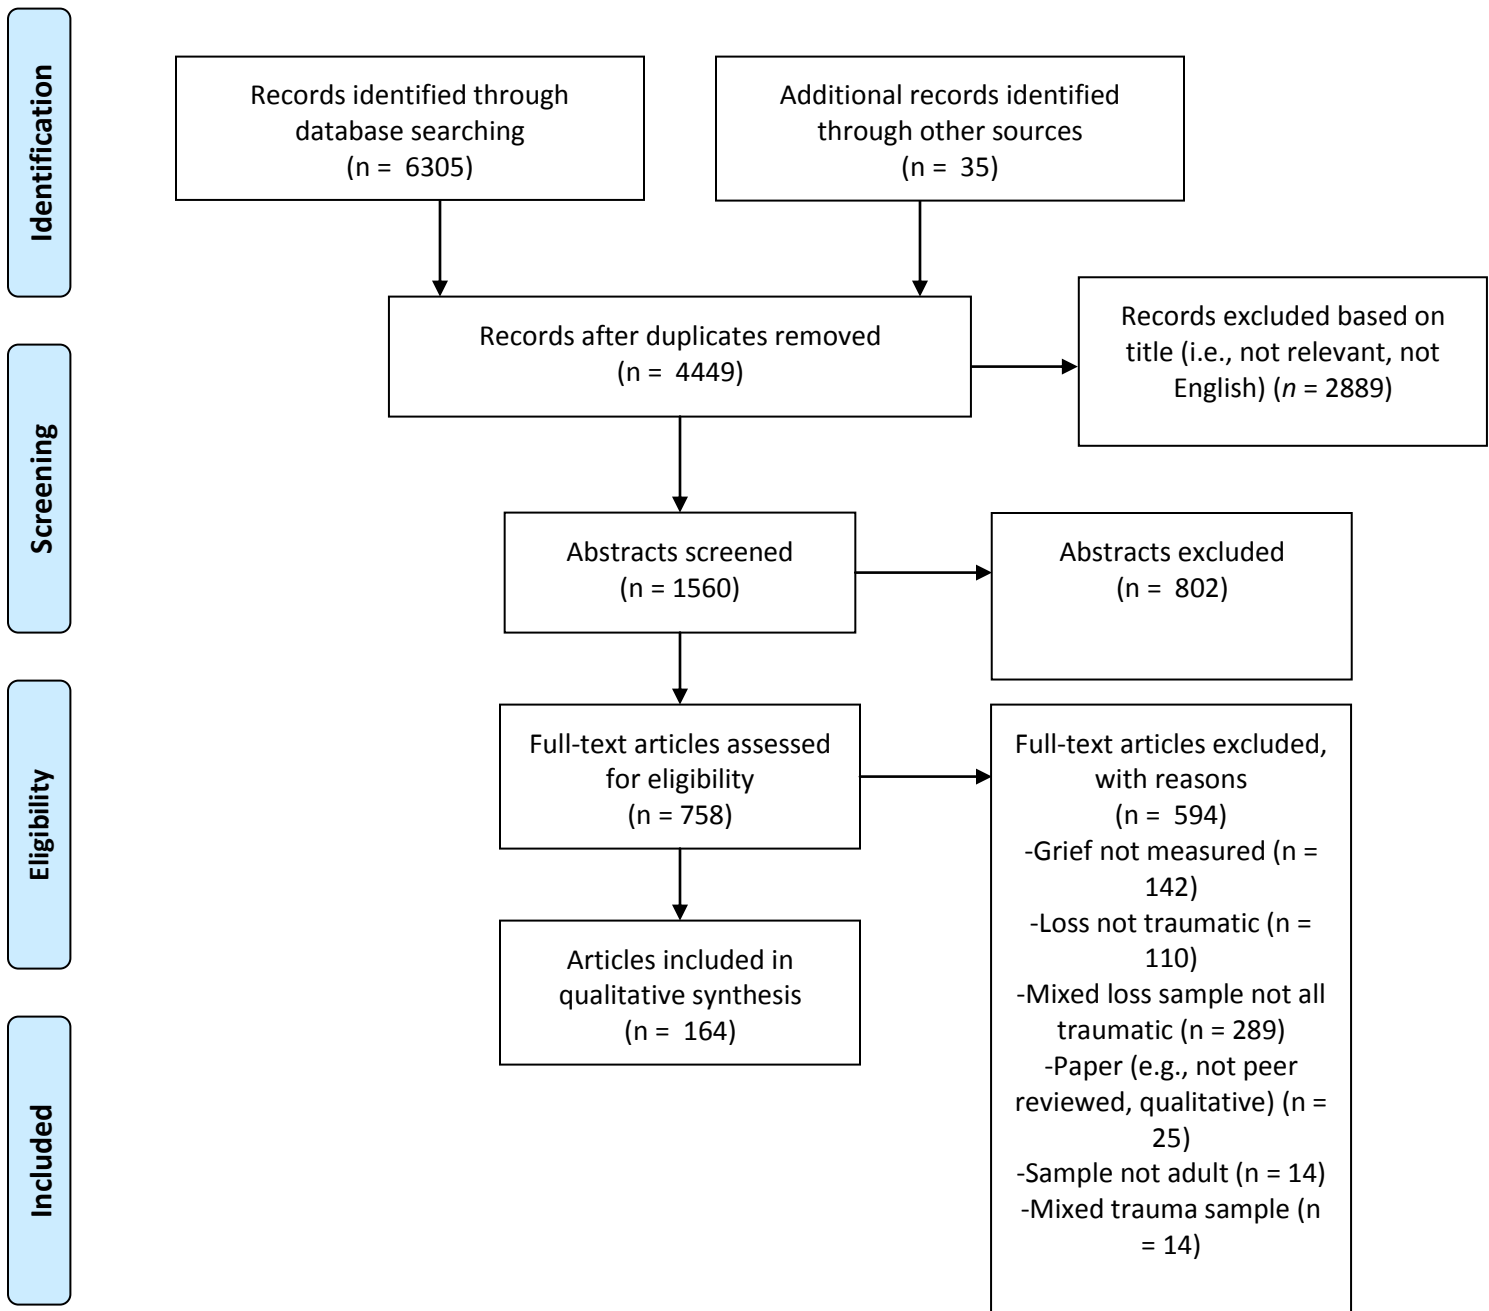

Supplement: NIHMS1815509-supplement-Supp_1.pdf [file NIHMS1815509-supplement-Supp_1.pdf]
